# Supplementary material for: Influence of pyrethroïd-treated bed net on host seeking behavior of Anopheles gambiae s.s. carrying the kdr allele
Source: PubMed Central journal article supplement (PMC5536278; doi:10.1371/journal.pone.0164518), 2017-07-31
Supplement: pone.0164518.s001.pdf [file pone.0164518.s001.pdf]

**S1 Table: Effect of treatment on environmental variables.** Comparison between the two arms. \*\*\*p<0.001, \*\*p≤0.01, \*p≤0.05, ns= not significant.

| Treatment    | Environmental variable | Significant |
|--------------|------------------------|-------------|
| Empty        | CO2                    | ns          |
|              | HR                     | ns          |
| Rabbit alone | CO2                    | ns          |
|              | HR                     | ns          |
| Rabbit+UTN   | CO2                    | ns          |
|              | HR                     | **          |
| Rabbit+ITN   | CO2                    | ns          |
|              | HR                     | ns          |
